# Supplementary material
Source: PubMed Central journal article supplement (PMC5776077)
Supplement: NIHMS905672-supplement-001778_-_Au_Removal_Consent_Korpi-Hyovalti.pdf [file NIHMS905672-supplement-001778_-_Au_Removal_Consent_Korpi-Hyovalti.pdf]

The following is a statement of Dr. Eeva Korpi-Hyövähti, who has retired from her work and has requested and has consented her removal as coauthor from the manuscript "New blood pressure associated loci identified in meta-analyses of 475,000 individuals, dated July 11, 2017.

**Statement**

I am happy to be deleted from the manuscript

"New blood pressure associated loci identified in meta-analyses of 475,000 individuals".

Seinäjoki the 11th July 2017

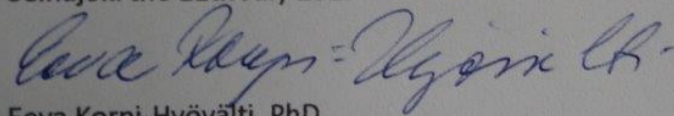A handwritten signature in blue ink that reads "Eeva Korpi-Hyövähti". The signature is written in a cursive style.

Eeva Korpi-Hyövähti, PhD
